# Supplementary material for: DNA Methylation Patterns of Chronic Explosive Breaching in U.S. Military Warfighters
Source: Front Neurol. 2020 Oct 23;11:1010. doi: 10.3389/fneur.2020.01010 (PMC7645105; doi:10.3389/fneur.2020.01010)
Supplement: Supplementary file 7 [file Table_4.XLSX]

## Sheet: ringEar
id	Chr	Start	End	n_probes	p	p-corrected	Strand	Peak.Score	Focus.Ratio/Region.Size	Annotation	Detailed.Annotation	Distance.to.TSS	Nearest.PromoterID	Entrez.ID	Nearest.Unigene	Nearest.Refseq	Nearest.Ensembl	Gene.Name	Gene.Alias	Gene.Description	Gene.Type	meth_diff	gainloss
1	chr1	154839814	154839983	3	9.597e-07	0.004248	+	0		intron (NM_002249, intron 1 of 7)	intron (NM_002249, intron 1 of 7)	2856	NM_001204087	3782	Hs.490765	NM_002249	ENSG00000143603	KCNN3	KCa2.3|SK3|SKCA3|hSK3	potassium calcium-activated channel subfamily N member 3	protein-coding	-0.166881	Loss
2	chr2	731216	731519	5	2.082e-08	5.165e-05	+	0		Intergenic	MER4A1|LTR|ERV1	-53928	NM_152834	129787	Hs.43899	NM_152834	ENSG00000151353	TMEM18	-	transmembrane protein 18	protein-coding	0.152977	Gain
3	chr2	237416339	237416370	4	9.929e-07	0.02313	+	0		promoter-TSS (NM_001270584)	promoter-TSS (NM_001270584)	-176	NM_001270584	79781	Hs.591594	NM_024726	ENSG00000132321	IQCA1	4930465P12Rik|DRC11|IQCA	IQ motif containing with AAA domain 1	protein-coding	0.0768807	Gain
4	chr3	194500944	194501102	2	5.813e-07	0.002754	+	0		non-coding (NR_037891, exon 4 of 4)	non-coding (NR_037891, exon 4 of 4)	71873	NR_037891	100507391	Hs.590099	NR_037891	ENSG00000237222	LINC01968	-	long intergenic non-protein coding RNA 1968	ncRNA	0.103364	Gain
5	chr3	195538731	195538917	4	3.918e-06	0.01567	+	0		promoter-TSS (NM_001322468)	promoter-TSS (NM_001322468)	20	NM_004532	4585	Hs.369646	NM_004532	ENSG00000145113	MUC4	ASGP|HSA276359|MUC-4	mucin 4, cell surface associated	protein-coding	-0.0363246	Loss
6	chr4	24796920	24797176	7	2.057e-11	6.037e-08	+	0		promoter-TSS (NM_003102)	promoter-TSS (NM_003102)	-37	NM_003102	6649	Hs.2420	NM_003102	ENSG00000109610	SOD3	EC-SOD	superoxide dismutase 3, extracellular	protein-coding	-0.0620385	Loss
7	chr5	41869958	41870081	3	8.718e-08	0.0005301	+	0		promoter-TSS (NR_046635)	promoter-TSS (NR_046635)	-113	NR_046635	100874002	Hs.375537	NR_046635	ENSG00000248668	OXCT1-AS1	-	OXCT1 antisense RNA 1	ncRNA	0.102457	Gain
8	chr6	31409468	31409706	8	2.079e-07	0.0006557	+	0		non-coding (NR_144465, exon 1 of 2)	non-coding (NR_144465, exon 1 of 2)	143	NR_144465	101929111	Hs.686866	NR_144465		LINC01149	-	long intergenic non-protein coding RNA 1149	ncRNA	0.0842231	Gain
9	chr11	47270236	47270581	9	3.517e-07	0.0007663	+	0		promoter-TSS (NM_001302489)	promoter-TSS (NM_001302489)	-10	NM_001610	53	Hs.532492	NM_001610	ENSG00000134575	ACP2	LAP	acid phosphatase 2, lysosomal	protein-coding	-0.0410196	Loss
10	chr15	25068739	25068790	6	5.6e-09	8.121e-05	+	0		promoter-TSS (NM_022806)	promoter-TSS (NM_022806)	-20	NM_022807	6638	Hs.555970	NM_003097	ENSG00000128739	SNRPN	HCERN3|PWCR|RT-LI|SM-D|SMN|SNRNP-N|SNURF-SNRPN|sm-N	small nuclear ribonucleoprotein polypeptide N	protein-coding	-0.0501106	Loss
11	chr15	101084981	101085177	6	5.386e-07	0.00206	+	0		promoter-TSS (NM_001290342)	promoter-TSS (NM_001290342)	-154	NM_001290343	204219	Hs.662371	NM_178842	ENSG00000154227	CERS3	ARCI9|LASS3	ceramide synthase 3	protein-coding	0.0767288	Gain
12	chr16	67841270	67841294	3	4.484e-08	0.001352	+	0		promoter-TSS (NM_001320238)	promoter-TSS (NM_001320238)	501	NM_001288993	55815	Hs.632212	NM_018430	ENSG00000102904	TSNAXIP1	TXI1	translin associated factor X interacting protein 1	protein-coding	-0.0555409	Loss
13	chr17	80606881	80607047	4	1.604e-09	7.244e-06	+	0		promoter-TSS (NM_019613)	promoter-TSS (NM_019613)	-553	NM_019613	56270	Hs.132161	NM_019613	ENSG00000141580	WDR45B	WDR45L|WIPI-3|WIPI3	WD repeat domain 45B	protein-coding	-0.0926031	Loss
14	chr18	74961786	74961968	7	8.21e-07	0.003378	+	0		promoter-TSS (NM_001480)	promoter-TSS (NM_001480)	-131	NM_001480	2587	Hs.272191	NM_001480	ENSG00000166573	GALR1	GALNR|GALNR1	galanin receptor 1	protein-coding	0.0406849	Gain

## Sheet: headache
id	Chr	Start	End	n_probes	p	p-corrected	Strand	Peak.Score	Focus.Ratio/Region.Size	Annotation	Detailed.Annotation	Distance.to.TSS	Nearest.PromoterID	Entrez.ID	Nearest.Unigene	Nearest.Refseq	Nearest.Ensembl	Gene.Name	Gene.Alias	Gene.Description	Gene.Type	meth_diff	gainloss
1	chr1	59043071	59043370	7	3.038e-09	7.638e-06	+	0		promoter-TSS (NM_002353)	promoter-TSS (NM_002353)	-54	NM_002353	4070	Hs.23582	NM_002353	ENSG00000184292	TACSTD2	EGP-1|EGP1|GA733-1|GA7331|GP50|M1S1|TROP2	tumor-associated calcium signal transducer 2	protein-coding	-0.0862405	Loss
2	chr1	203320224	203320732	10	1.661e-12	2.461e-09	+	0		promoter-TSS (NM_002023)	promoter-TSS (NM_002023)	79	NR_103757	2331	Hs.519168	NM_002023	ENSG00000122176	FMOD	FM|SLRR2E	fibromodulin	protein-coding	-0.0989136	Loss
3	chr6	28129314	28129616	7	6.121e-08	0.0001523	+	0		promoter-TSS (NR_103448)	promoter-TSS (NR_103448)	-74	NR_103448	651302	Hs.172143	NM_001145129	ENSG00000226314	ZNF192P1	ZNF389|ZNF389P|dJ265C24.4	zinc finger protein 192 pseudogene 1	pseudo	-0.050691	Loss
4	chr6	32064498	32064810	15	3.267e-09	7.871e-06	+	0		exon (NM_019105, exon 3 of 44).2	exon (NM_019105, exon 3 of 44).2	12497	NM_019105	7148	Hs.485104	NM_019105	ENSG00000168477	TNXB	EDS3|HXBL|TENX|TN-X|TNX|TNXB1|TNXB2|TNXBS|VUR8|XB|XBS	tenascin XB	protein-coding	0.054508	Gain
5	chr7	112262547	112262597	4	9.934e-08	0.001468	+	0		non-coding (NR_110158, exon 1 of 8)	non-coding (NR_110158, exon 1 of 8)	136	NR_110158	101928012	Hs.521131	NR_110158	ENSG00000223646	LOC101928012	-	uncharacterized LOC101928012	ncRNA	0.0873932	Gain
6	chr8	125462979	125463066	6	4.391e-09	3.763e-05	+	0		promoter-TSS (NM_017956)	promoter-TSS (NM_017956)	-26	NM_017956	55039	Hs.9925	NM_017956	ENSG00000183665	TRMT12	TRM12|TYW2	tRNA methyltransferase 12 homolog	protein-coding	0.117733	Gain
7	chr15	45315298	45315438	6	4.203e-08	0.0002248	+	0		promoter-TSS (NM_003104)	promoter-TSS (NM_003104)	66	NM_003104	6652	Hs.878	NM_003104	ENSG00000140263	SORD	HEL-S-95n|SORD1	sorbitol dehydrogenase	protein-coding	-0.0815906	Loss
8	chr15	101084981	101085177	6	1.969e-07	0.0007534	+	0		promoter-TSS (NM_001290342)	promoter-TSS (NM_001290342)	-154	NM_178842	204219	Hs.662371	NM_178842	ENSG00000154227	CERS3	ARCI9|LASS3	ceramide synthase 3	protein-coding	0.0625833	Gain
9	chr16	89118839	89119002	3	8.445e-07	0.003876	+	0		Intergenic	CpG	-41297	NM_001284316	197322	Hs.461727	NM_174917	ENSG00000176715	ACSF3	-	acyl-CoA synthetase family member 3	protein-coding	-0.051223	Loss
10	chr17	37123639	37123835	6	8.53e-07	0.00326	+	0		promoter-TSS (NM_001008777)	promoter-TSS (NM_001008777)	-82	NM_001008777	494188	Hs.549536	NM_001008777	ENSG00000204952	FBXO47	-	F-box protein 47	protein-coding	0.0619281	Gain
11	chr17	78417790	78418076	6	8.72e-12	2.291e-08	+	0		Intergenic	CpG	24715	NR_039883	100616359		NR_039883	ENSG00000264961	MIR4730	-	microRNA 4730	ncRNA	-0.0529061	Loss
12	chr20	52029859	52029943	2	6.638e-07	0.005872	+	0		intron (NM_001193421, intron 2 of 2)	LTR16C|LTR|ERVL	-139408	NR_110051	101927770		NR_110051		LOC101927770	-	uncharacterized LOC101927770	ncRNA	0.0554134	Gain
13	chr22	36635883	36636079	3	8.179e-07	0.003126	+	0		promoter-TSS (NM_030882)	promoter-TSS (NM_030882)	19	NM_145637	23780	Hs.474740	NM_030882	ENSG00000128335	APOL2	APOL-II|APOL3	apolipoprotein L2	protein-coding	0.0811831	Gain

## Sheet: sleep
id	Chr	Start	End	n_probes	p	p-corrected	Strand	Peak.Score	Focus.Ratio/Region.Size	Annotation	Detailed.Annotation	Distance.to.TSS	Nearest.PromoterID	Entrez.ID	Nearest.Unigene	Nearest.Refseq	Nearest.Ensembl	Gene.Name	Gene.Alias	Gene.Description	Gene.Type	meth_diff	gainloss
1	chr3	146187110	146187210	4	8.645e-07	0.006435	+	0		promoter-TSS (NM_001199978)	promoter-TSS (NM_001199978)	-72	NM_001199978	57047	Hs.744414	NM_020359	ENSG00000163746	PLSCR2	-	phospholipid scramblase 2	protein-coding	-0.0988894	Loss
2	chr6	28058790	28058973	7	5.492e-08	0.0002251	+	0		non-coding (NR_024063, exon 1 of 2)	non-coding (NR_024063, exon 1 of 2)	296	NR_024063	221584	Hs.634723	NR_024063		ZSCAN12P1	ZNF187p1|ZNF305P1|ZNF96L1|ZNF96P1|ZSCAN12L1|dJ313I6.7	zinc finger and SCAN domain containing 12 pseudogene 1	pseudo	-0.0540585	Loss
3	chr6	28129314	28129616	8	4.8e-09	1.195e-05	+	0		promoter-TSS (NR_103448)	promoter-TSS (NR_103448)	-74	NR_103448	651302	Hs.172143	NM_001145129	ENSG00000226314	ZNF192P1	ZNF389|ZNF389P|dJ265C24.4	zinc finger protein 192 pseudogene 1	pseudo	-0.0538306	Loss
4	chr7	151107925	151108105	5	1.755e-08	7.31e-05	+	0		promoter-TSS (NM_001284260)	promoter-TSS (NM_001284260)	-224	NM_001284262	349136	Hs.647083	NM_198285	ENSG00000187260	WDR86	-	WD repeat domain 86	protein-coding	-0.033146	Loss
5	chr15	101084981	101085111	5	5.412e-08	0.0003115	+	0		promoter-TSS (NM_001290342)	promoter-TSS (NM_001290342)	-121	NM_178842	204219	Hs.662371	NM_178842	ENSG00000154227	CERS3	ARCI9|LASS3	ceramide synthase 3	protein-coding	0.0639275	Gain
6	chr16	89118839	89119002	3	4.71e-08	0.0002166	+	0		Intergenic	CpG	-41297	NR_104293	197322	Hs.461727	NM_174917	ENSG00000176715	ACSF3	-	acyl-CoA synthetase family member 3	protein-coding	-0.0534211	Loss
7	chr17	7283775	7283897	4	7.97e-07	0.004875	+	0		promoter-TSS (NM_003985)	promoter-TSS (NM_003985)	-457	NM_001251902	8711	Hs.203420	NM_003985	ENSG00000174292	TNK1	-	tyrosine kinase non receptor 1	protein-coding	-0.0347244	Loss
8	chr18	52626669	52626848	6	1.537e-07	0.000644	+	0		promoter-TSS (NM_025214)	promoter-TSS (NM_025214)	-19	NM_025214	80323	Hs.120790	NM_025214	ENSG00000166510	CCDC68	SE57-1	coiled-coil domain containing 68	protein-coding	0.059517	Gain
9	chr19	11784515	11784774	7	1.158e-08	3.358e-05	+	0		promoter-TSS (NR_028594)	promoter-TSS (NR_028594)	-169	NR_028594	401898	Hs.672384	NM_001013691		ZNF833P	ZNF833	zinc finger protein 833, pseudogene	pseudo	0.0607553	Gain
10	chr22	19929067	19929286	8	5.374e-09	1.842e-05	+	0		promoter-TSS (NM_000754)	promoter-TSS (NM_000754)	-87	NM_000754	1312	Hs.370408	NM_000754	ENSG00000093010	COMT	HEL-S-98n	catechol-O-methyltransferase	protein-coding	0.0740192	Gain
